# Supplementary material
Source: publisher figshare collection journal article supplement (https://acs.figshare.com/ndownloader/files/3797950)
Supplement: Supplementary file 1 [file 3797950]

# Supporting Information

## **Molar Mass versus Polymer Solar Cell Performance: Highlighting the Role of Homocouplings**

Tim Vangerven\*, Pieter Verstappen, Jeroen Drijkoningen, Wouter Dierckx, Scott Himmelberger, Alberto Salleo, Dirk Vanderzande, Wouter Maes and Jean V. Manca

### **Table of Contents**

|                                                    |     |
|----------------------------------------------------|-----|
| 1. GPC profiles on a linear scale                  | S2  |
| 2. <i>J-V</i> curves for the optimized solar cells | S3  |
| 3. MALDI-TOF mass spectra and analysis             | S4  |
| 4. <sup>1</sup> H NMR spectra of P1 and P4         | S10 |
| 5. XRD data                                        | S12 |
| 6. TPV/TPC analysis                                | S13 |
| 7. AFM images                                      | S14 |

## 1. GPC profiles on a linear scale

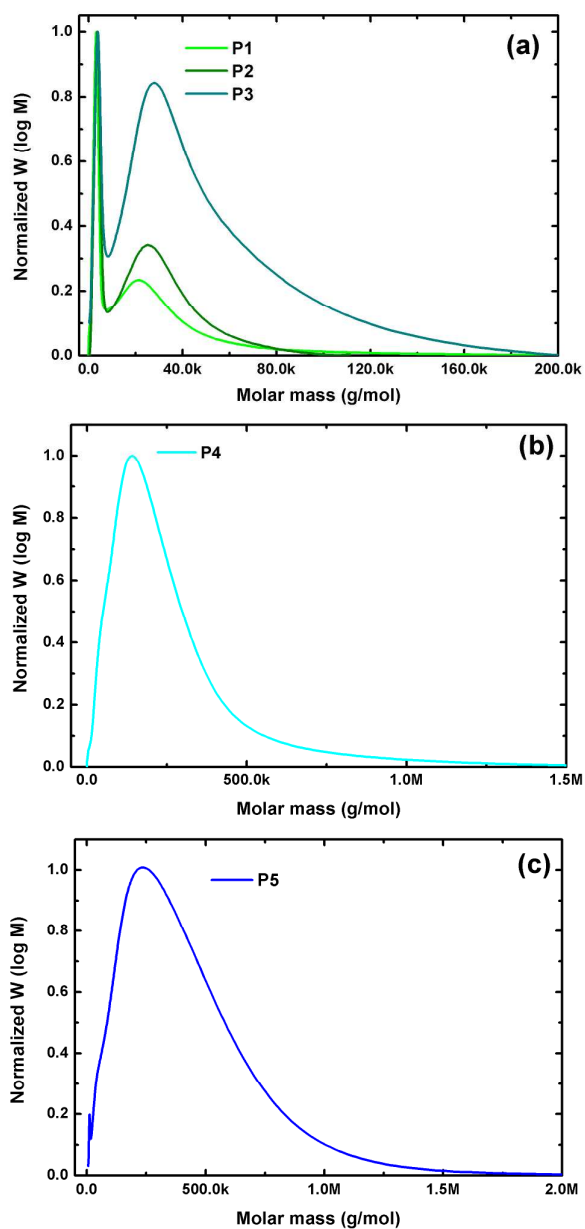

**Figure S1.** Molar mass distributions of the as received PTB7 batches (as measured by GPC) plotted on a linear scale: (a) P1–P3, (b) P4, (c) P5.

## 2. *J-V* curves for the optimized solar cells

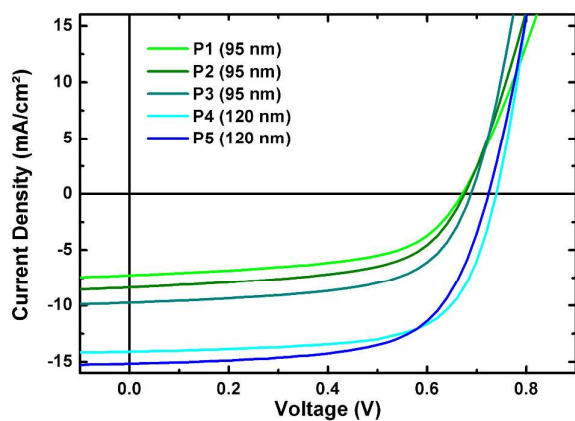

**Figure S2.** Current density-voltage curves for the optimized solar cells prepared with the different PTB7 batches. The active area of each cell was 3 mm<sup>2</sup>. The corresponding optimized active layer thicknesses are shown in the legend.

### 3. MALDI-TOF mass spectra and analysis

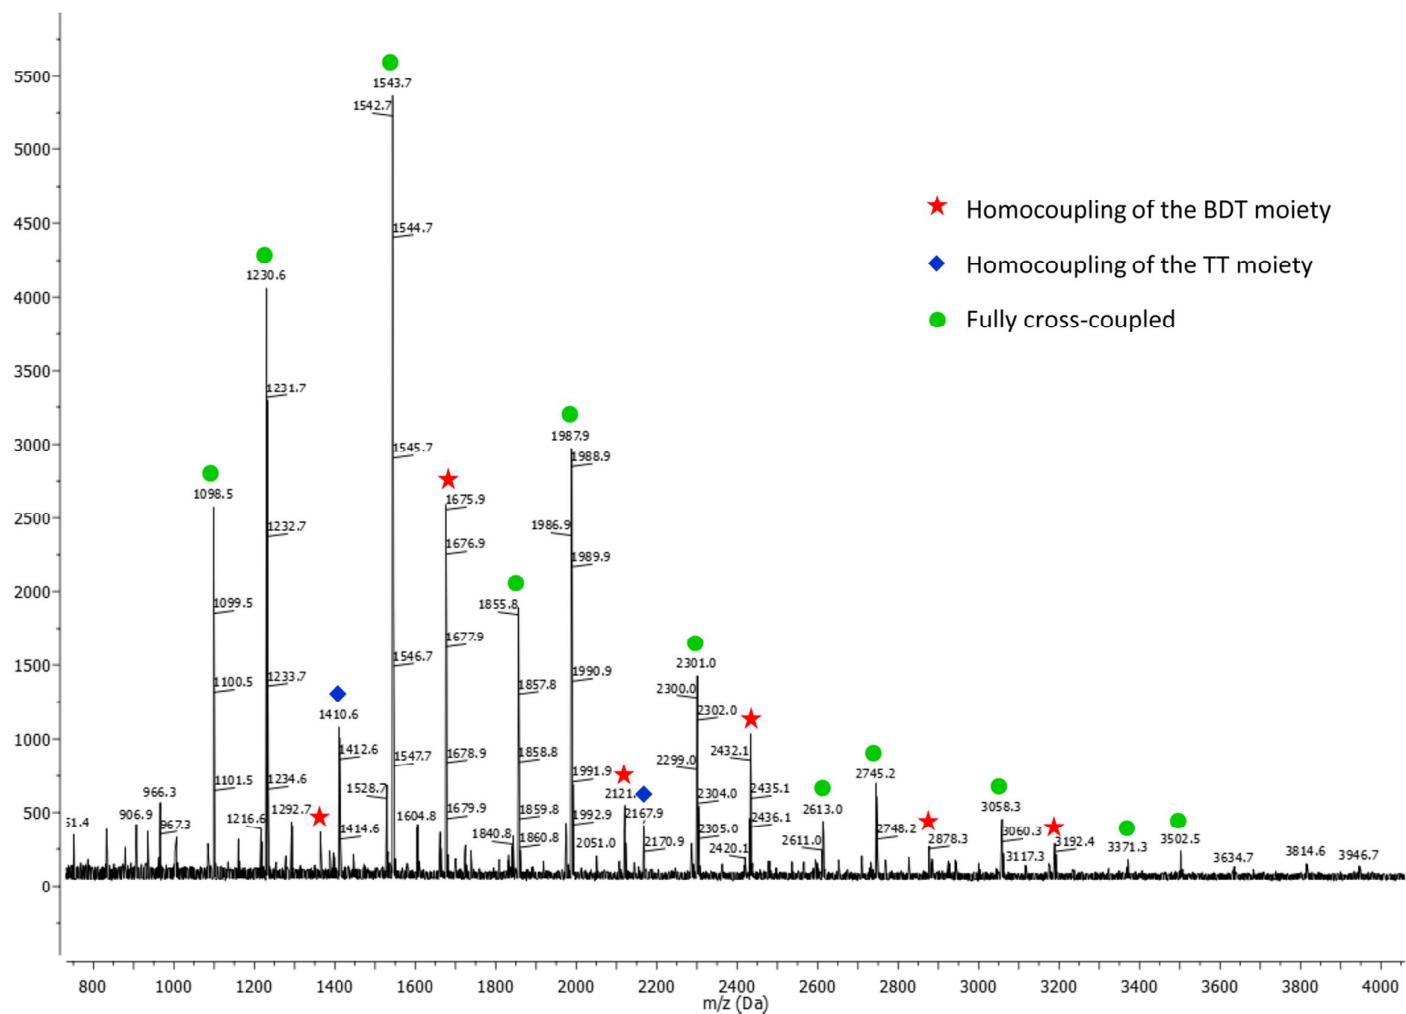

Figure S3. MALDI-TOF mass spectrum for PTB7 batch P1.

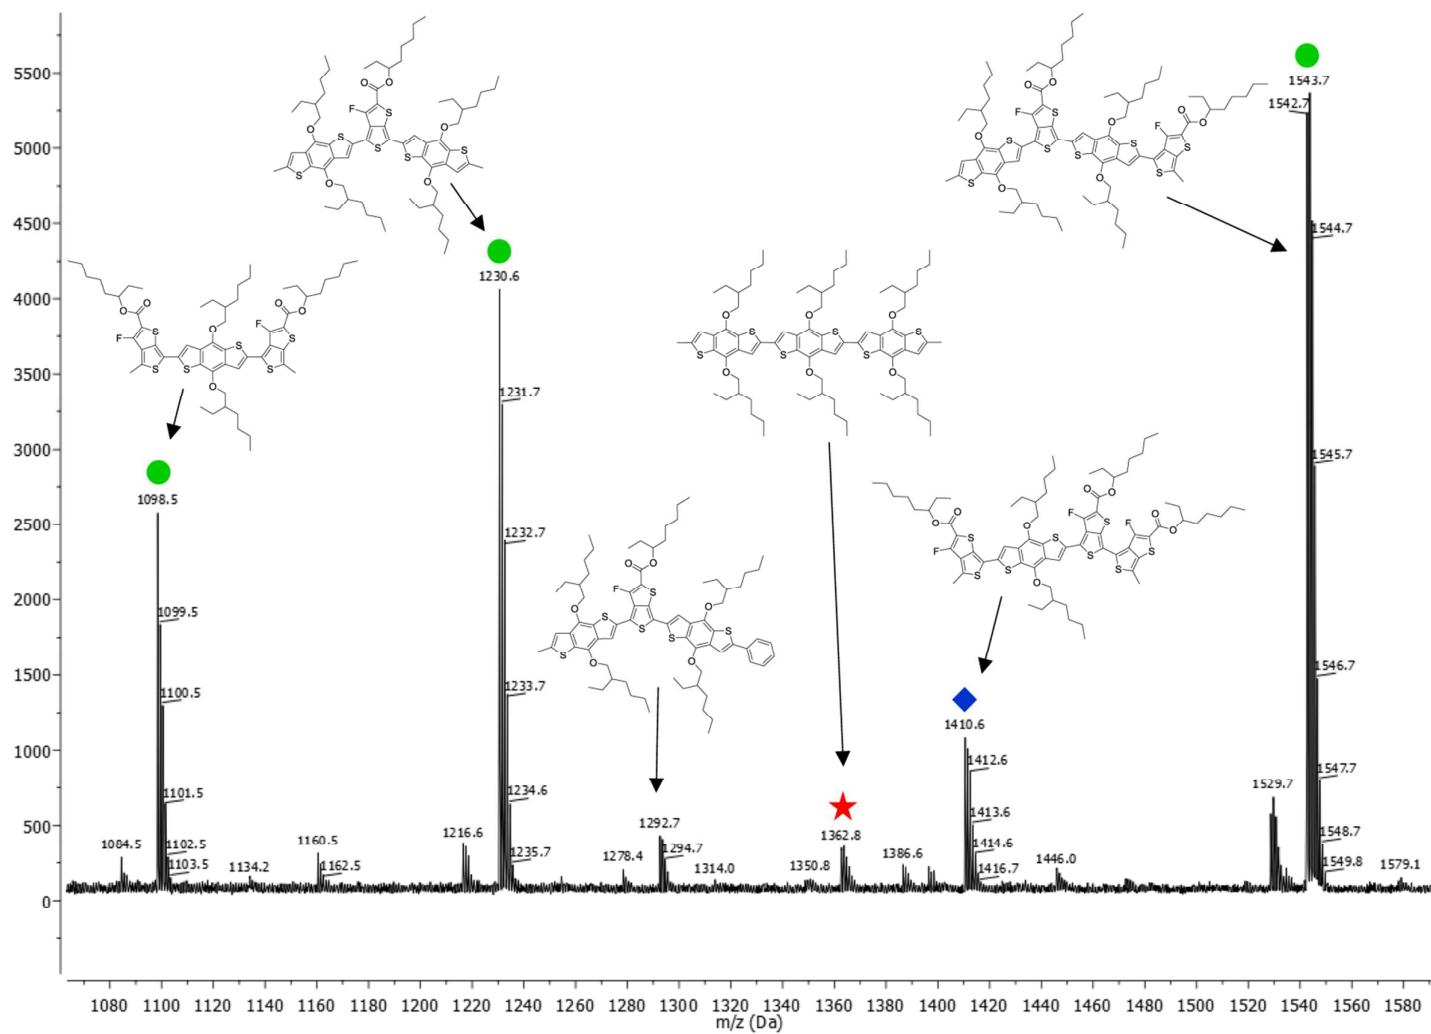

**Figure S4.** MALDI-TOF mass spectrum for PTB7 batch P1 (zoom from  $m/z$  1070–1590  $\text{g mol}^{-1}$ ), with identification of the different species.

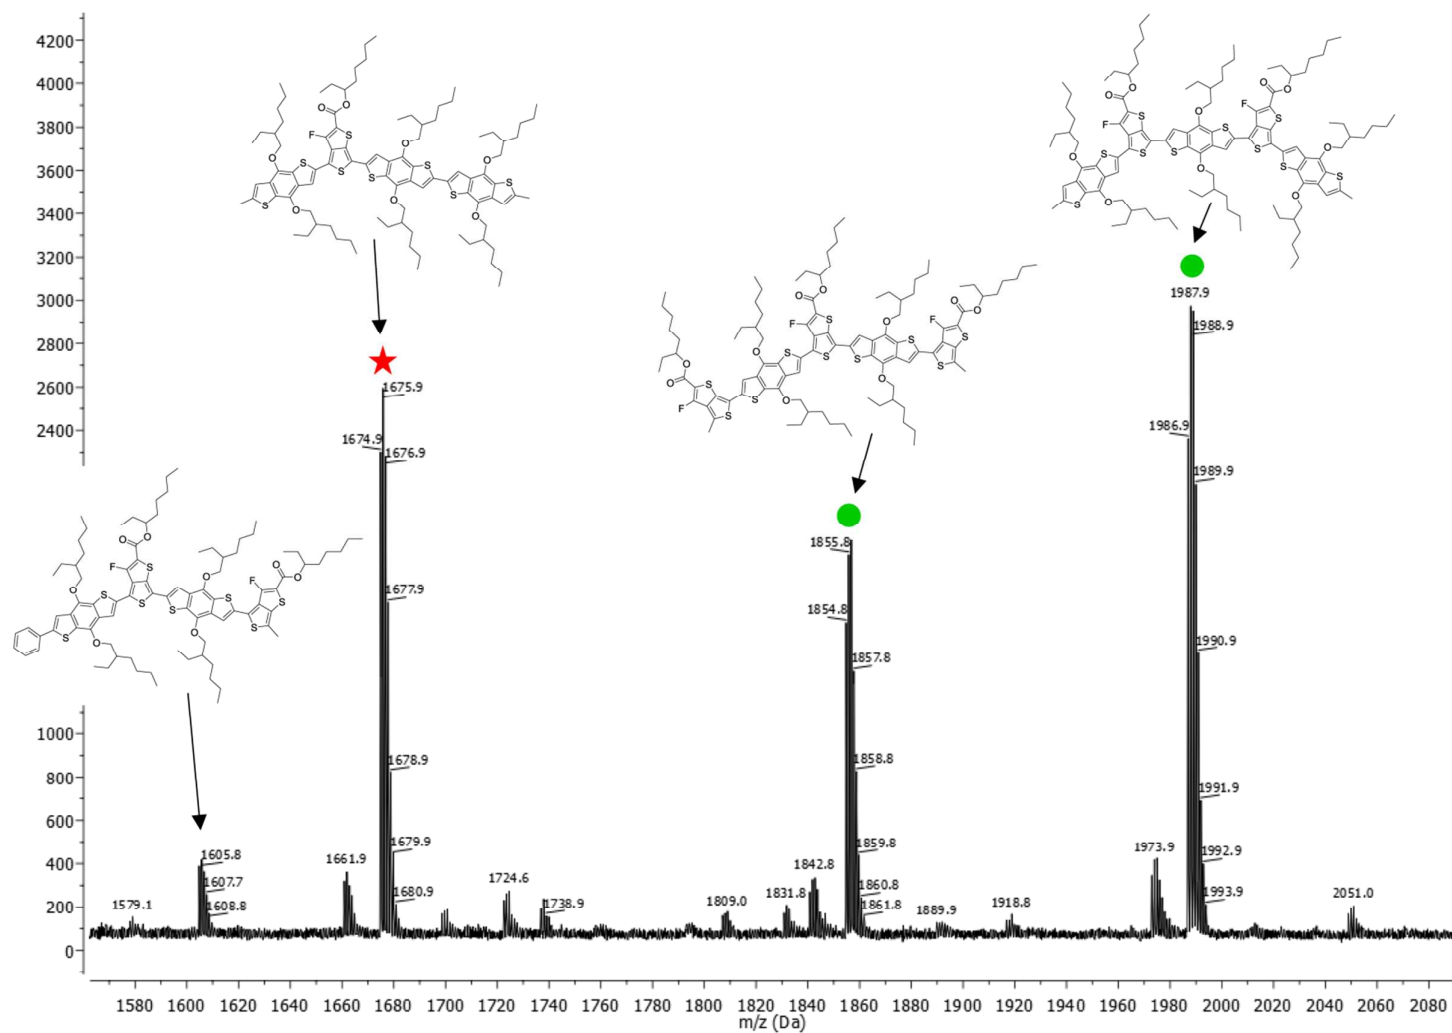

**Figure S5.** MALDI-TOF mass spectrum for PTB7 batch P1 (zoom from  $m/z$  1570–2090  $\text{g mol}^{-1}$ ), with identification of the different species.

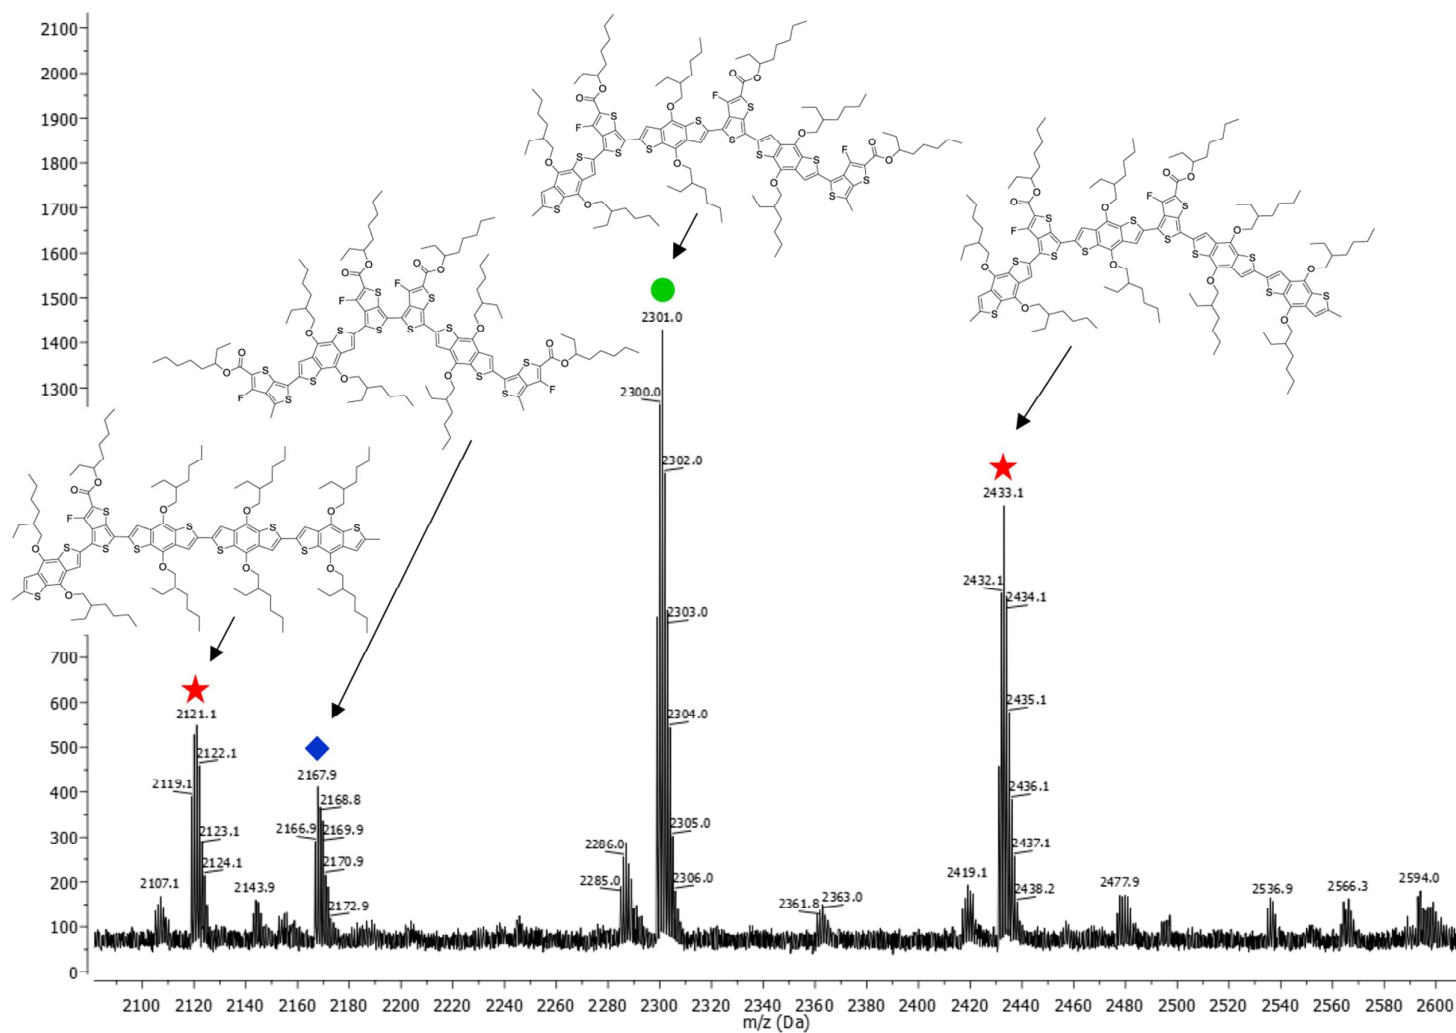

**Figure S6.** MALDI-TOF mass spectrum for PTB7 batch P1 (zoom from  $m/z$  2090–2610  $\text{g mol}^{-1}$ ), with identification of the different species.

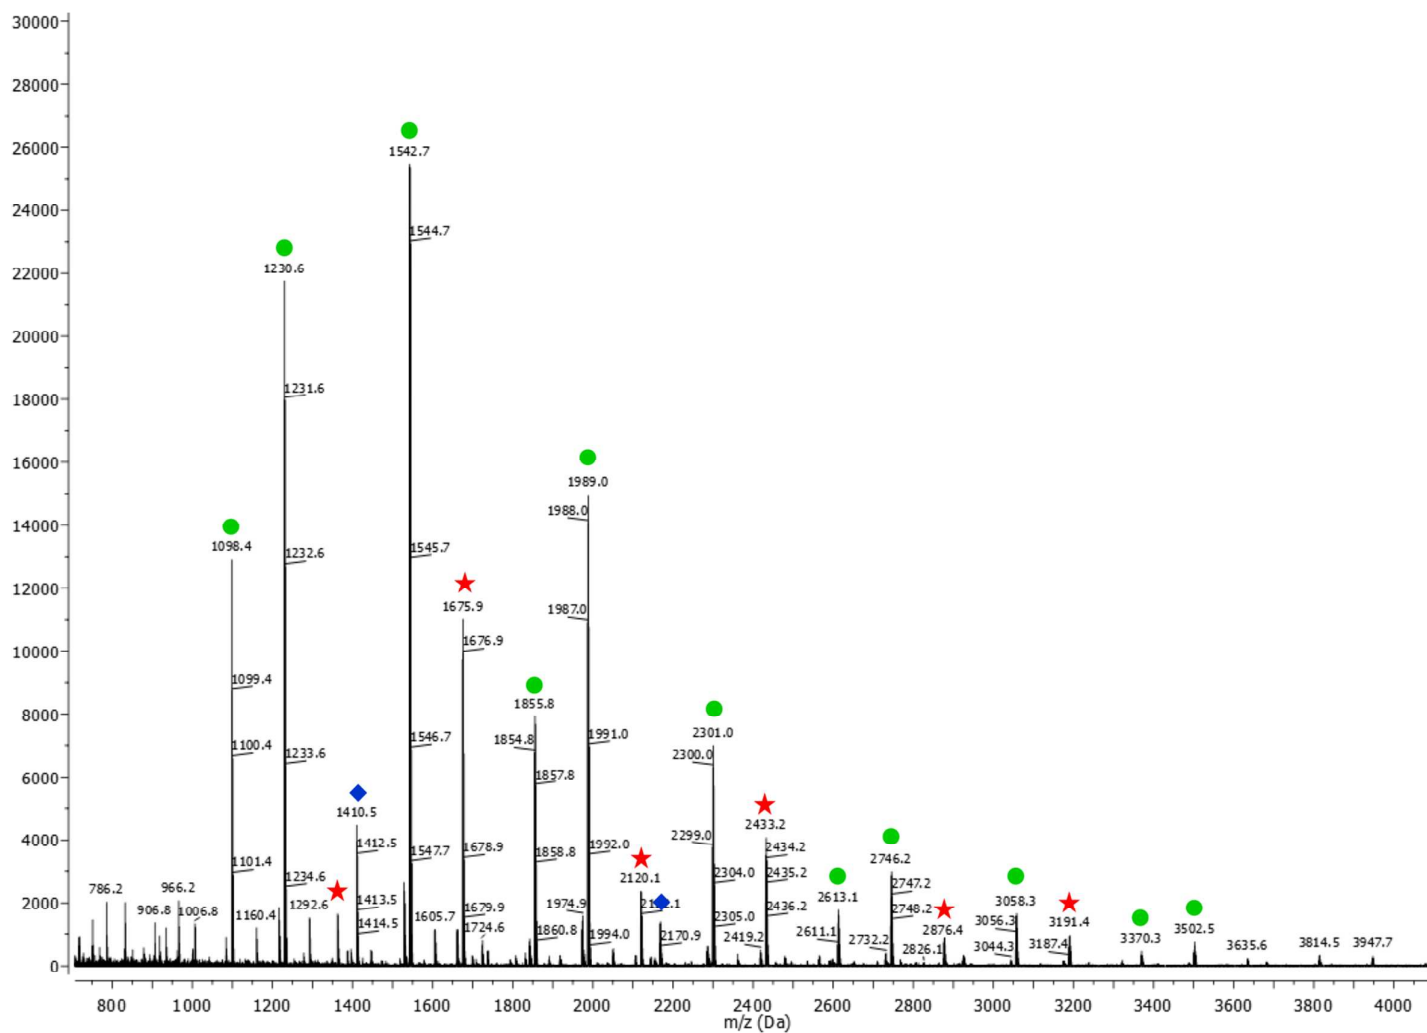

**Figure S7.** MALDI-TOF mass spectrum for PTB7 batch P2.



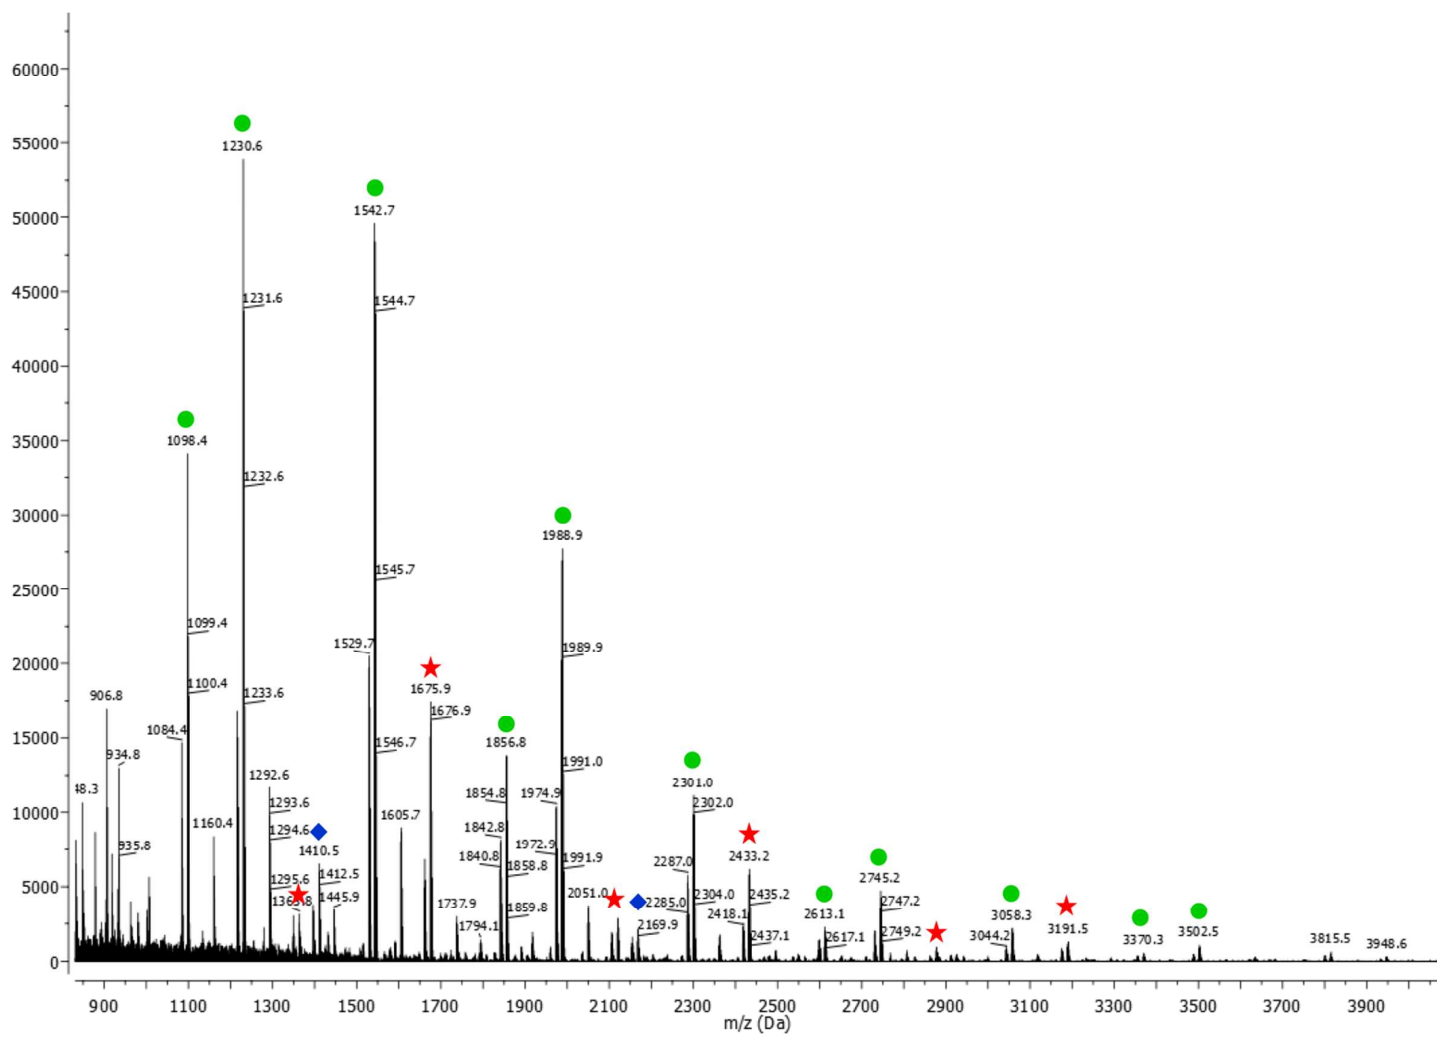

**Figure S8.** MALDI-TOF mass spectrum for PTB7 batch P3.

#### 4. $^1\text{H}$ NMR spectra of P1 and P4

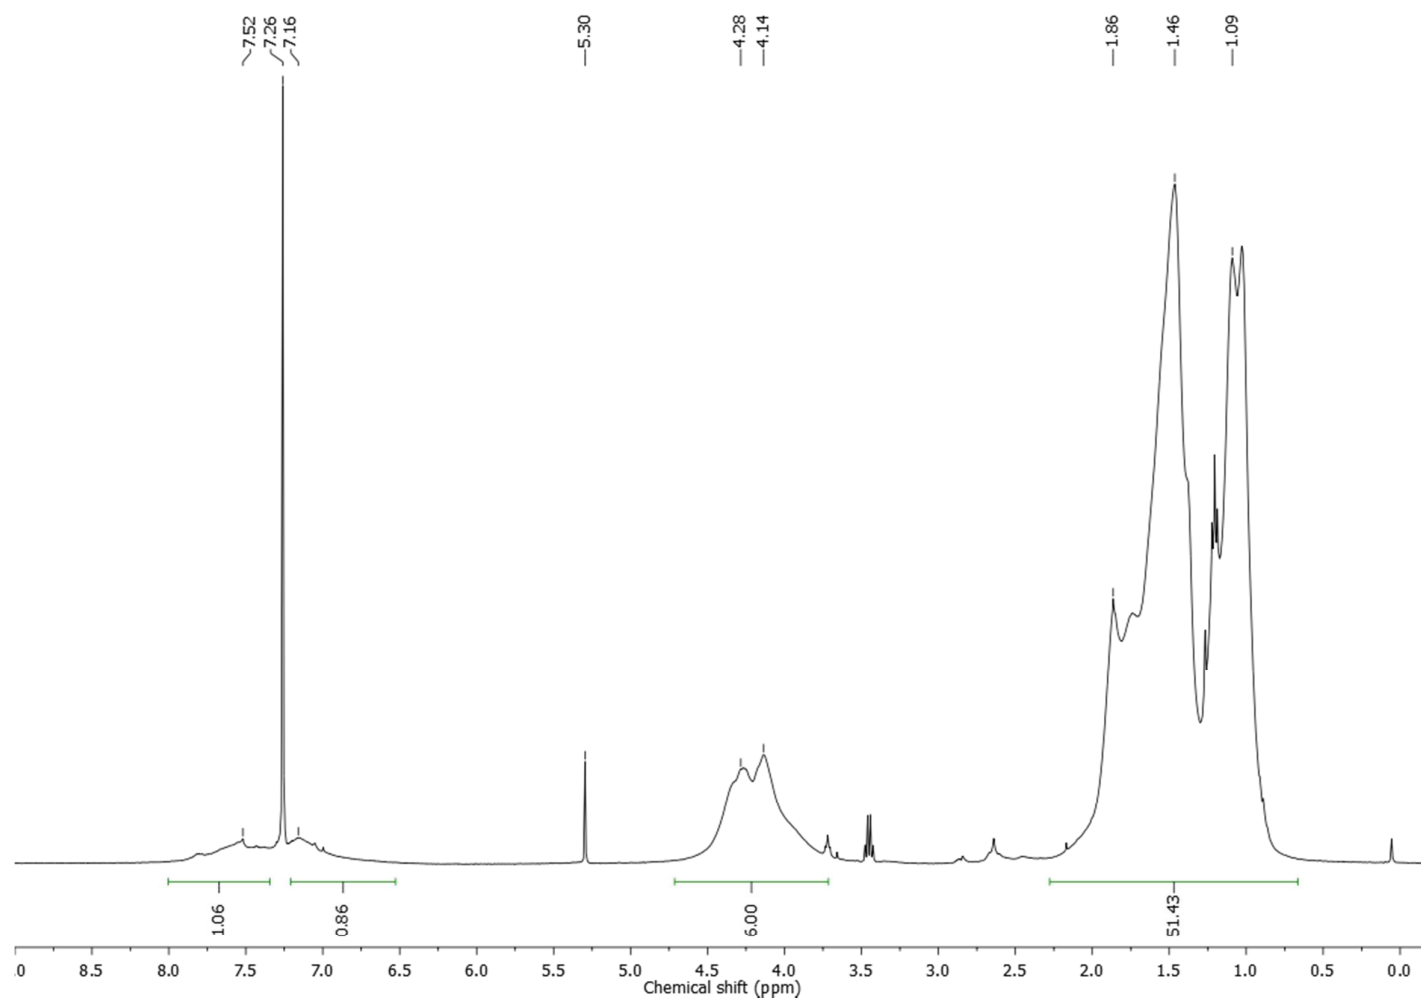

**Figure S9.**  $^1\text{H}$  NMR spectrum of PTB7 batch P1 (400 MHz,  $\text{CDCl}_3:\text{CS}_2$  1:3).

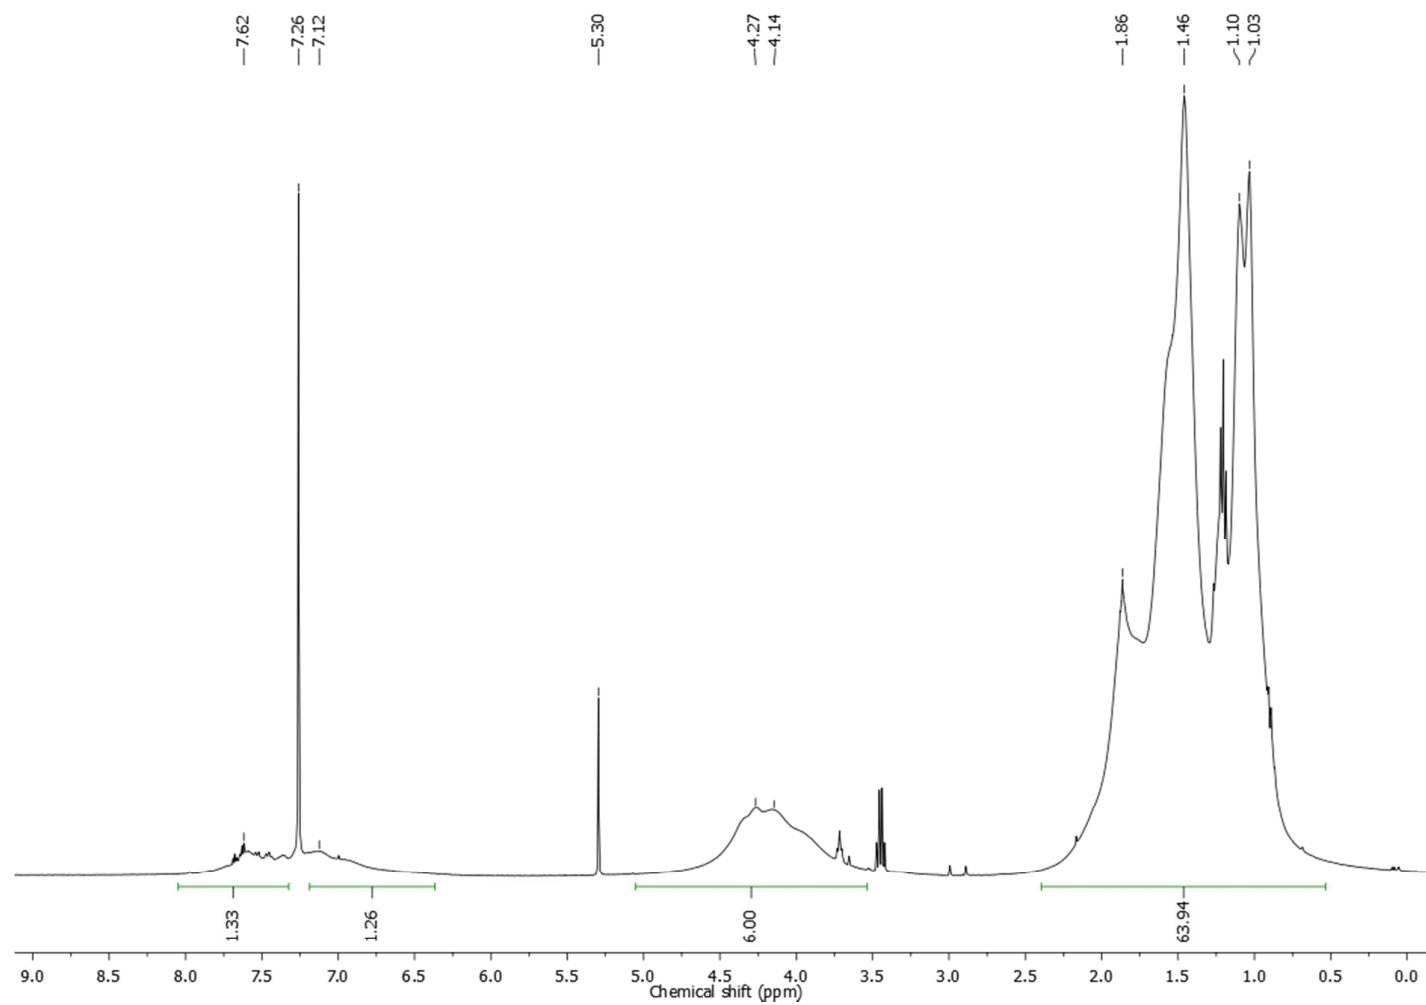

**Figure S10.**  $^1\text{H}$  NMR spectrum of PTB7 batch P4 (400 MHz,  $\text{CDCl}_3:\text{CS}_2$  1:3).

## 5. XRD data

**Table S1.** Alkyl stacking distance and coherence length of the studied PTB7:PC<sub>71</sub>BM blend films.

| Batch | Alkyl coherence length (Å) | Alkyl stacking distance (Å) | $\pi$ - $\pi$ coherence length (Å) | $\pi$ - $\pi$ stacking distance (Å) |
|-------|----------------------------|-----------------------------|------------------------------------|-------------------------------------|
| P1    | 71 $\pm$ 8                 | 20.1 $\pm$ 0.3              | 28 $\pm$ 9                         | 3.9 $\pm$ 0.1                       |
| P2    | 72 $\pm$ 8                 | 20 $\pm$ 0.3                | 26 $\pm$ 9                         | 3.9 $\pm$ 0.1                       |
| P3    | 57 $\pm$ 6                 | 19.9 $\pm$ 0.3              | 22 $\pm$ 9                         | 3.9 $\pm$ 0.1                       |
| P4    | 29 $\pm$ 9                 | 17.4 $\pm$ 0.3              | 22 $\pm$ 9                         | 3.9 $\pm$ 0.1                       |
| P5    | 29 $\pm$ 9                 | 17.4 $\pm$ 0.3              | 15 $\pm$ 9                         | 3.9 $\pm$ 0.1                       |

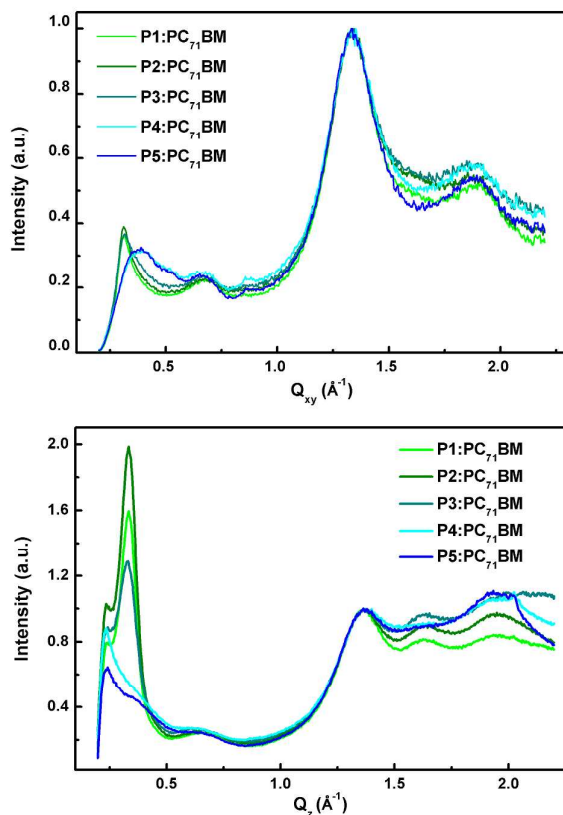

**Figure S11.** 2-Dimensional X-ray diffraction patterns for the studied PTB7:PC<sub>71</sub>BM blend films.

## 6. TPV/TPC analysis

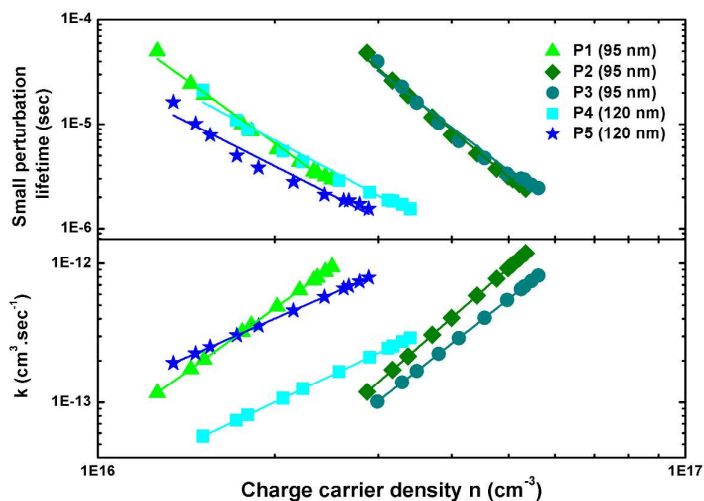

**Figure S12.** Small perturbation lifetime and recombination coefficient  $k$  in function of the charge carrier density as determined by TPV/TPC for the cells with optimal layer thickness.

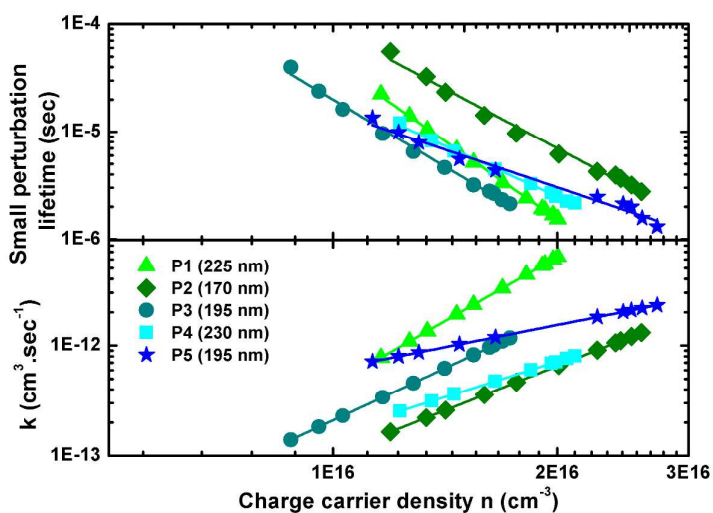

**Figure S13.** Small perturbation lifetime and recombination coefficient  $k$  in function of the charge carrier density as determined by TPV/TPC for cells with thicker active layers ( $>170$  nm).

## 7. AFM images

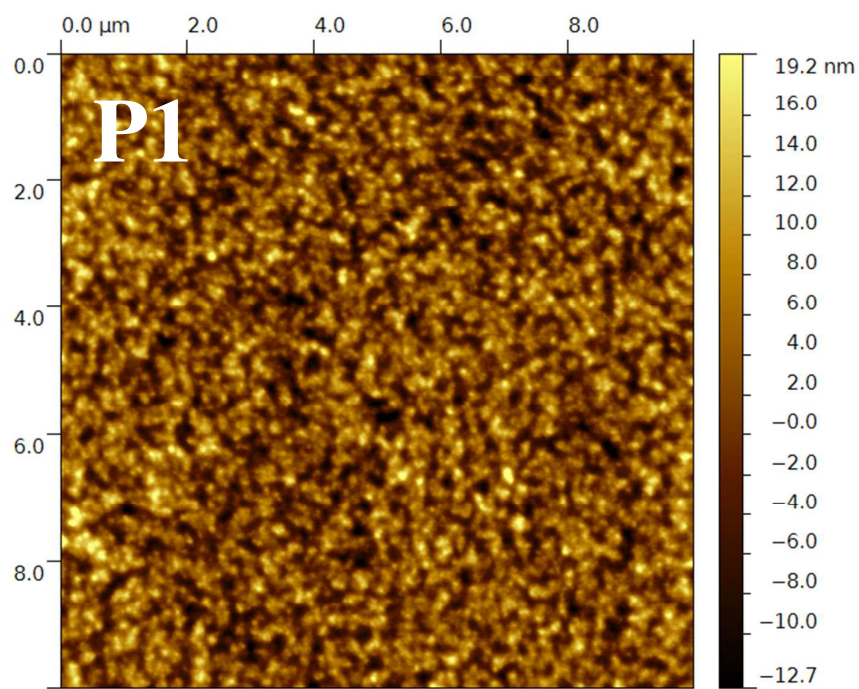

**Figure S14.** PF-QNM AFM image (10x10 μm) for the PTB7:PC<sub>71</sub>BM blend film based on P1.

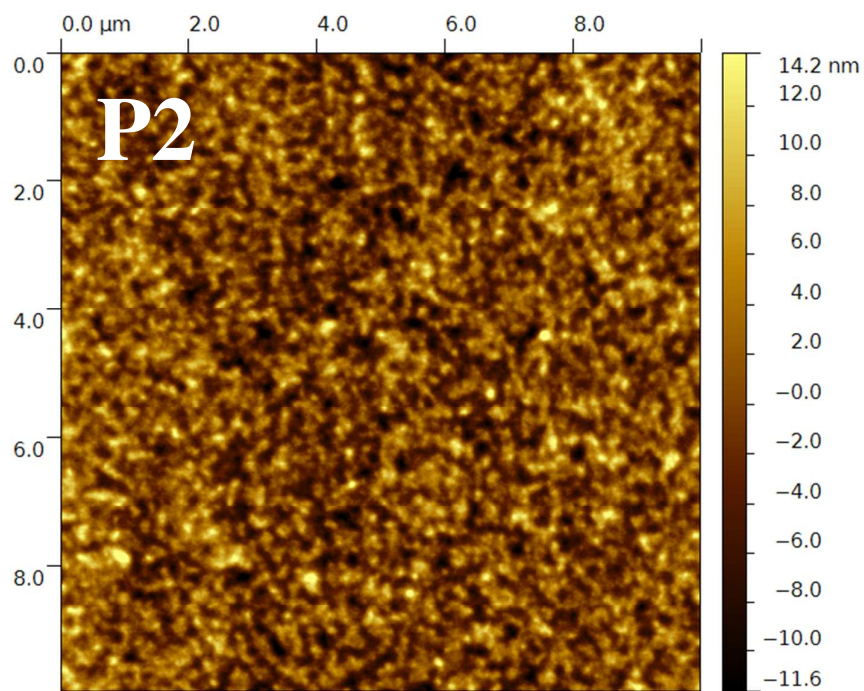

**Figure S15.** PF-QNM AFM image (10x10 μm) for the PTB7:PC<sub>71</sub>BM blend film based on P2.



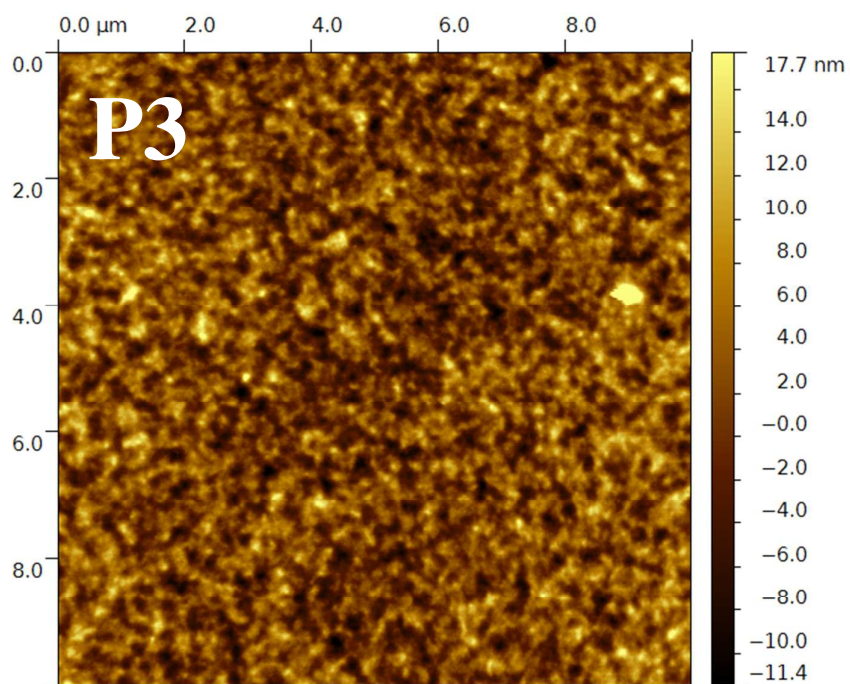

**Figure S16.** PF-QNM AFM image (10x10 μm) for the PTB7:PC<sub>71</sub>BM blend film based on P3.

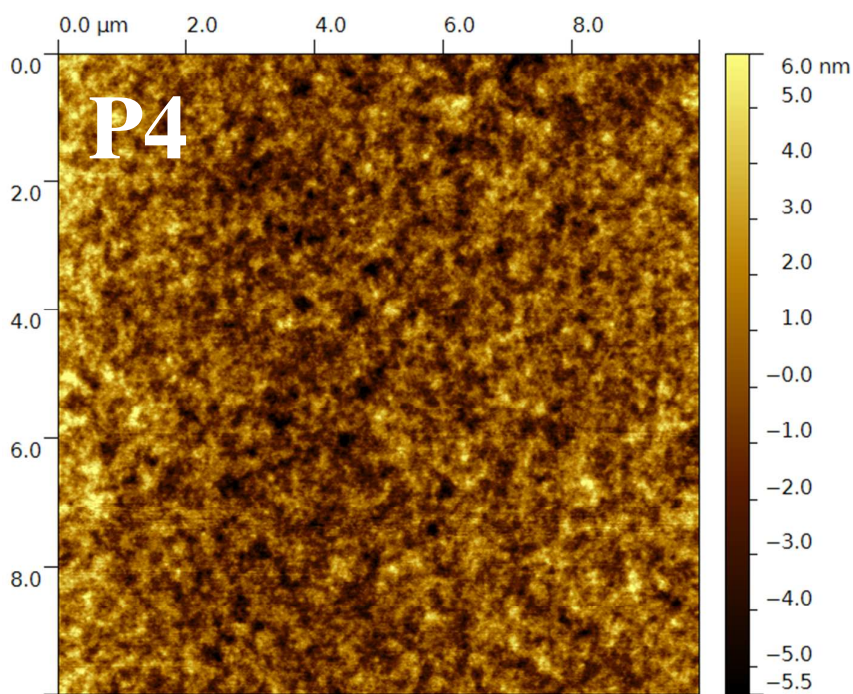

**Figure S17.** PF-QNM AFM image (10x10 μm) for the PTB7:PC<sub>71</sub>BM blend film based on P4.

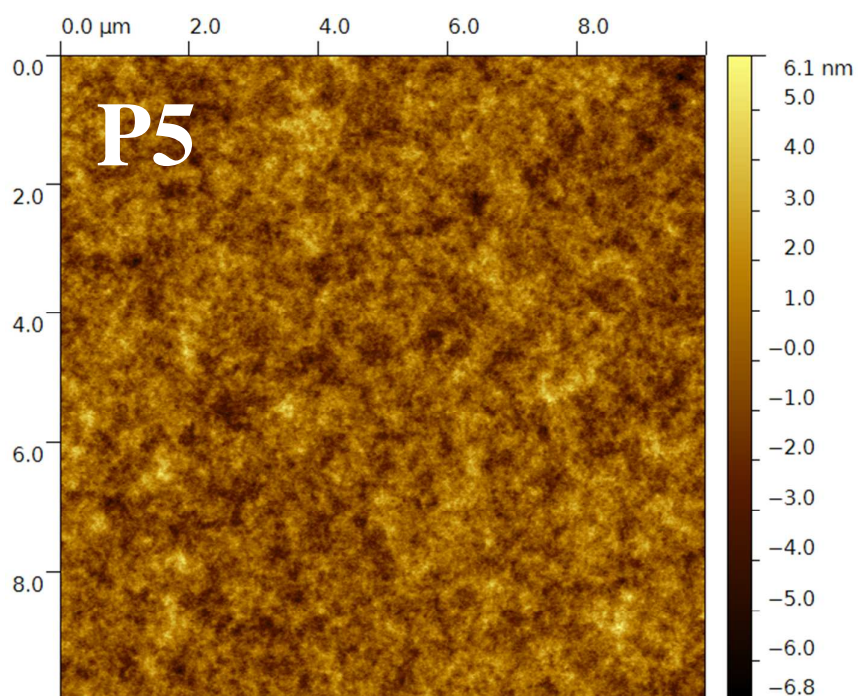

**Figure S18.** PF-QNM AFM image (10x10 μm) for the PTB7:PC<sub>71</sub>BM blend film based on P5.
